# Supplementary material for: Admission testing for higher education: A multi-cohort study on the validity of high-fidelity curriculum-sampling tests
Source: PLOS journal article supplement (doi:10.1371/journal.pone.0198746), 2018-06-11
Supplement: S1 (10.1371/journal.pone.0198746.s001) [file journal.pone.0198746.s001]

**S1 Table. Descriptive statistics for predictor variables in Study 1.**

| Variable | 2013     |                      |                       |                       |                       |                        |                        |            |               |               |          |
|----------|----------|----------------------|-----------------------|-----------------------|-----------------------|------------------------|------------------------|------------|---------------|---------------|----------|
|          | <i>n</i> | <i>M<sub>a</sub></i> | <i>M<sub>r1</sub></i> | <i>M<sub>r3</sub></i> | <i>SD<sub>a</sub></i> | <i>SD<sub>r1</sub></i> | <i>SD<sub>r3</sub></i> | $\alpha_a$ | $\alpha_{r1}$ | $\alpha_{r3}$ | <i>k</i> |
| Cur. 1   | 851      | 29.1                 | 29.7                  | 30.7                  | 5.6                   | 5.2                    | 4.6                    | .81        | .77           | .73           | 40       |
| Math     | 851      | 16.2                 | 16.6                  | 17.0                  | 4.7                   | 4.7                    | 4.5                    | .76        | .76           | .74           | 30       |
| English  | 851      | 13.4                 | 13.7                  | 13.9                  | 3.4                   | 3.3                    | 3.4                    | .70        | .69           | .71           | 20       |
| HSGPA    | 201      |                      | 6.7                   | 6.7                   |                       | 0.4                    | 0.5                    |            | .73           |               |          |
| FCG      | 625      |                      | 6.6                   | 7.0                   |                       | 1.4                    | 1.1                    |            | 0.74          |               |          |
| Variable | 2014     |                      |                       |                       |                       |                        |                        |            |               |               |          |
|          | <i>n</i> | <i>M<sub>a</sub></i> | <i>M<sub>r1</sub></i> | <i>M<sub>r3</sub></i> | <i>SD<sub>a</sub></i> | <i>SD<sub>r1</sub></i> | <i>SD<sub>r3</sub></i> | $\alpha_a$ | $\alpha_{r1}$ | $\alpha_{r3}$ | <i>k</i> |
| Cur. 1   | 823      | 28.9                 | 29.9                  |                       | 5.9                   | 5.4                    |                        | .82        | .80           |               | 40       |
| Math     | 823      | 17.5                 | 17.8                  |                       | 5.0                   | 5.0                    |                        | .77        | .76           |               | 30       |
| English  | 823      | 13.7                 | 13.9                  |                       | 2.6                   | 2.5                    |                        | .58        | .55           |               | 20       |
| HSGPA    | 217      |                      | 6.6                   |                       |                       | 0.5                    |                        |            | .77           |               |          |
| FCG      | 630      |                      | 6.7                   |                       |                       | 1.6                    |                        |            |               |               |          |
| Variable | 2015     |                      |                       |                       |                       |                        |                        |            |               |               |          |
|          | <i>n</i> | <i>M<sub>a</sub></i> | <i>M<sub>r1</sub></i> | <i>M<sub>r3</sub></i> | <i>SD<sub>a</sub></i> | <i>SD<sub>r1</sub></i> | <i>SD<sub>r3</sub></i> | $\alpha_a$ | $\alpha_{r1}$ | $\alpha_{r3}$ | <i>k</i> |
| Cur. 1   | 654      | 28.7                 | 29.2                  |                       | 5.1                   | 4.7                    |                        | .76        | .74           |               | 39       |
| Cur. 2   | 654      | 19.1                 | 19.4                  |                       | 3.5                   | 3.3                    |                        | .71        | .69           |               | 25       |
| Math     | 654      | 17.0                 | 16.9                  |                       | 4.6                   | 4.6                    |                        | .76        | .74           |               | 27       |
| HSGPA    | 118      |                      | 6.5                   |                       |                       | 0.4                    |                        |            | .64           |               |          |
| FCG      | 515      |                      | 6.3                   |                       |                       | 1.5                    |                        |            |               |               |          |

*Note.* Cur. 1 = curriculum-sampling test based on literature, Cur. 2 = curriculum-sampling test based on a video lecture, Math = math test, English = English reading comprehension test, HSGPA = high school mean grade, FCG = first course grade, *M* = mean, *SD* = standard deviation,  $\alpha$  = Cronbach's alpha, *k* = number of items, <sub>a</sub> = based on applicant pool data, <sub>r1</sub> = based on enrolled student data in year 1, <sub>r3</sub> = based on enrolled student data in year 3.
