# Supplementary material for: Admission testing for higher education: A multi-cohort study on the validity of high-fidelity curriculum-sampling tests
Source: PLOS journal article supplement (doi:10.1371/journal.pone.0198746), 2018-06-11
Supplement: S4 (10.1371/journal.pone.0198746.s004) [file journal.pone.0198746.s004]

**S4 Table. Descriptive statistics for the variables in Study 2.**

| Variable            | <i>M</i> | <i>SD</i> |
|---------------------|----------|-----------|
| Cognitive ability   | 6.39     | 1.14      |
| Conscientiousness   | 3.28     | .63       |
| Procrastination     | 3.17     | .48       |
| Academic Competence | 3.32     | .39       |
| Test Competence     | 2.99     | .46       |
| Time Management     | 2.88     | .62       |
| Strategic Studying  | 3.02     | .51       |
| Cur. 1              | 28.30    | 5.18      |
| Cur. 2              | 20.15    | 2.96      |
| FYGPA               | 6.57     | .79       |

*Note.* Cur. 1 = curriculum-sampling test based on literature, Cur. 2 = curriculum-sampling test based on a video lecture, FYGPA = First year GPA.
